# Supplementary material
Source: PubMed Central journal article supplement (PMC4992595)
Supplement: NIHMS786325-supplement-New_supp.pdf [file NIHMS786325-supplement-New_supp.pdf]

## Supplementary Information

**Supplemental Table 1**

Primers for PCR-genotyping, QRT-PCR, and Sanger sequencing

| Primer              | Sequence (5'→3')         | Locus                    | Usage      | Product (bp)                    |
|---------------------|--------------------------|--------------------------|------------|---------------------------------|
| <i>Ciz1_int1_F1</i> | catccaggggtcatggatt      | NC_000068 32363397 - 416 | Genotyping |                                 |
| <i>Ciz1_int1_R1</i> | gaagggggtatggtggtag      | NC_000068 32363802 - 783 | Genotyping | 406 (with <i>Ciz1_int1_F1</i> ) |
| <i>V76_F</i>        | cttgcaaaatggcgttacttaagc | Gene trap vector         | Genotyping | 292 (with <i>Ciz1_int1_R1</i> ) |
| <i>Ciz1_Q18F</i>    | aggcacagacacagacctctc    | NM_028412 1080 - 1100    | QRT-PCR    |                                 |
| <i>Ciz1_Q18R</i>    | atgggggctgtgatgta        | NM_028412 1160 - 1143    | QRT-PCR    | 81 (with <i>Ciz1_Q18F</i> )     |
| <i>Ciz1_Q31F</i>    | cccagaaacaggccagaac      | NM_028412 648 - 666      | QRT-PCR    |                                 |
| <i>Ciz1_Q31R</i>    | agaggcacctctgagaaga      | NM_028412 720 - 701      | QRT-PCR    | 73 (with <i>Ciz1_Q31F</i> )     |
| <i>Ciz1_Q40F</i>    | cttggggaaatacaacactcg    | NM_028412 1799 - 1819    | QRT-PCR    |                                 |
| <i>Ciz1_Q40R</i>    | gtgttcaccagcgtttg        | NM_028412 1911 - 1894    | QRT-PCR    | 113 (with <i>Ciz1_Q40F</i> )    |
| <i>Nup35_Q18F</i>   | ggcctccactagtactacca     | NM_027091 960 - 980      | QRT-PCR    |                                 |
| <i>Nup35_Q18R</i>   | agcatagcggctcagctcc      | NM_027091 1090 - 1073    | QRT-PCR    | 131 (with <i>Nup35_Q18F</i> )   |
| <i>Zbtb16_Q72F</i>  | agcacagggagaaccctagat    | NM_001033324 3412 - 3432 | QRT-PCR    |                                 |
| <i>Zbtb16_Q72R</i>  | agctcctcccctctgctc       | NM_001033324 3507 - 3490 | QRT-PCR    | 96 (with <i>Zbtb16_Q72F</i> )   |
| <i>Entpd4_Q64F</i>  | cgacctccatcgactgaagat    | NM_026174 1682 - 1703    | QRT-PCR    |                                 |
| <i>Entpd4_Q64R</i>  | ggagaagcctttgtgaaca      | NM_026174 1754 - 1735    | QRT-PCR    | 73 (with <i>Entpd4_Q64F</i> )   |
| <i>Npy_Q9F</i>      | ccgctctgcgacactacat      | NM_023456 241 - 259      | QRT-PCR    |                                 |
| <i>Npy_Q9R</i>      | tgtctcagggtggatctct      | NM_023456 308 - 289      | QRT-PCR    | 68 (with <i>Npy_Q9F</i> )       |
| <i>Mpp4_Q41F</i>    | gcctctgtcgcaggaagt       | NM_001164682 1904 - 1921 | QRT-PCR    |                                 |
| <i>Mpp4_Q41R</i>    | ccgctgttacctcaccac       | NM_001164682 2016 - 1999 | QRT-PCR    | 113 (with <i>Mpp4_Q41F</i> )    |
| <i>Creld2_Q6F</i>   | gcagacagcagaaggcaaa      | NM_029720 1053 - 1071    | QRT-PCR    |                                 |
| <i>Creld2_Q6R</i>   | tgcccgtcacaatcctc        | NM_029720 1125 - 1108    | QRT-PCR    | 73 (with <i>Creld2_Q6F</i> )    |
| <i>Psat1_Q21F</i>   | ccggtggatgttccaagt       | NM_177420 689 - 707      | QRT-PCR    |                                 |
| <i>Psat1_Q21R</i>   | ggatcctccggacaatca       | NM_177420 782 - 765      | QRT-PCR    | 94 (with <i>Psat1_Q21F</i> )    |
| <i>Nkain2_Q58F</i>  | aggctggagatctctcaaagg    | NM_001013411 473 - 493   | QRT-PCR    |                                 |
| <i>Nkain2_Q58R</i>  | gggtgcacagacgtcaccat     | NM_001013411 584 - 565   | QRT-PCR    | 112 (with <i>Nkain2_Q58F</i> )  |
| <i>Zfhx4_Q22F</i>   | tcgaccttgagatccacat      | NM_030708 5149 - 5168    | QRT-PCR    |                                 |
| <i>Zfhx4_Q22R</i>   | acttggtccagctttgcag      | NM_030708 5220 - 5201    | QRT-PCR    | 72 (with <i>Zfhx4_Q22F</i> )    |
| <i>Nr4a1_Q76F</i>   | agttctgccgctccaga        | NM_010444 1096 - 1113    | QRT-PCR    |                                 |
| <i>Nr4a1_Q76R</i>   | ggctgtctgtccgtacaact     | NM_010444 1161 - 1141    | QRT-PCR    | 66 (with <i>Nr4a1_Q76F</i> )    |
| <i>Opalin_Q55F</i>  | tgaactttactgccatcgaa     | NM_153520 91 - 112       | QRT-PCR    |                                 |
| <i>Opalin_Q55R</i>  | cagtccaatagaggaccaca     | NM_153520 176 - 156      | QRT-PCR    | 86 (with <i>Opalin_Q55F</i> )   |
| <i>Nr4a2_Q64F</i>   | tcagagcccacgtcgatt       | NM_013613 1551 - 1568    | QRT-PCR    |                                 |
| <i>Nr4a2_Q64R</i>   | tagtcagggtttgctggaa      | NM_013613 1623 - 1604    | QRT-PCR    | 73 (with <i>Nr4a2_Q64F</i> )    |

**Supplemental Table 2**Hematology and serum chemistry values for *Ciz1*<sup>-/-</sup> (KO) mice and *Ciz1*<sup>+/+</sup> (WT) littermates (10 mo)

| Index                     | WT-M1 | WT-M2 | WT-F1 | WT-F2 | WT (mean±SEM)  | KO-M1 | KO-M2 | KO-F1 | KO-F2 | KO (mean±SEM) | Reference (M/F)            |
|---------------------------|-------|-------|-------|-------|----------------|-------|-------|-------|-------|---------------|----------------------------|
| WBC (10 <sup>3</sup> /μl) | 8.08  | 5.03  | 5.18  | 6.70  | 6.25 ± 0.72    | 12.49 | 9.42  | 8.46  | 5.03  | 8.85 ± 1.53   | 4.45-13.96<br>3.90-13.94   |
| LYM (10 <sup>3</sup> /μl) | 7.50  | 4.43  | 4.53  | 6.04  | 5.62 ± 0.73    | 9.72  | 8.44  | 6.5   | 3.6   | 7.05 ± 1.34   | 3.24-11.15<br>2.88-10.92   |
| MON (10 <sup>3</sup> /μl) | 0.07  | 0.04  | 0.26  | 0.05  | 0.10 ± 0.05    | 0.91  | 0.34  | 0.84  | 0.03  | 0.53 ± 0.21   | 0.15-0.94<br>0.17-0.69     |
| NEU (10 <sup>3</sup> /μl) | 0.51  | 0.56  | 0.39  | 0.61  | 0.52 ± 0.05    | 1.87  | 0.64  | 1.11  | 1.44  | 1.26 ± 0.26   | 0.53-3.09<br>0.42-2.55     |
| LYM%                      | 92.9  | 88.2  | 87.5  | 90.1  | 89.7 ± 1.2     | 78.0  | 89.7  | 76.9  | 70.8  | 78.8 ± 3.9    | 61.26-87.18<br>70.19-87.82 |
| MON%                      | 0.8   | 0.8   | 5.1   | 0.7   | 1.85 ± 1.08    | 7.2   | 3.5   | 9.9   | 0.6   | 5.30 ± 2.04   | 2.18-11.02<br>2.19-7.06    |
| NEU%                      | 6.4   | 11.0  | 7.5   | 9.1   | 8.49 ± 1.01    | 14.8  | 6.8   | 13.2  | 18.5  | 13.33 ± 2.44  | 7.36-28.59<br>7.44-22.67   |
| RBC (10 <sup>6</sup> /μl) | 9.3   | 9.3   | 9.9   | 9.0   | 9.39 ± 0.20    | 10.4  | 9.4   | 9.0   | 8.6   | 9.35 ± 0.38   | 7.14-12.20<br>7.37-11.50   |
| HGB g/dl                  | 13.0  | 13.1  | 14.5  | 13.3  | 13.46 ± 0.35   | 14.7  | 14.4  | 13.5  | 12.4  | 13.75 ± 0.52  | 10.8-19.2<br>10.9-18.1     |
| HCT %                     | 37.1  | 37.5  | 40.2  | 37.5  | 38.07 ± 0.72   | 42.8  | 39.5  | 37.7  | 36.2  | 39.06 ± 1.42  | 37.3-62.0<br>37.2-58.0     |
| MCV fl                    | 40    | 40    | 41    | 42    | 40.75 ± 0.48   | 41    | 42    | 42    | 42    | 41.75 ± 0.25  | 42.7-56.0<br>42.6-55.6     |
| MCH pg                    | 14.0  | 14.0  | 14.7  | 14.9  | 14.4 ± 0.23    | 14.2  | 15.3  | 15.0  | 14.4  | 14.7 ± 0.26   | 11.7-16.3<br>13.0-16.8     |
| MCHC g/dl                 | 35.1  | 34.9  | 36.1  | 35.5  | 35.39 ± 0.27   | 34.5  | 36.4  | 35.7  | 34.3  | 35.21 ± 0.51  | 24.6-34.9<br>26.0-35.9     |
| RDWc %                    | 18.3  | 18.3  | 18.6  | 17.9  | 18.28 ± 0.0.14 | 18.7  | 18.2  | 18.2  | 19.9  | 18.74 ± 0.40  | 15.9-20.3<br>16.1-21.1     |
| PLT (10 <sup>3</sup> /μl) | 499   | 675   | 599   | 471   | 561 ± 47       | 486   | 658   | 573   | 644   | 590 ± 39      | 841-2159<br>565-1849       |
| MPV fl                    | 6.8   | 7.1   | 7.6   | 6.7   | 7.04 ± 0.21    | 7.2   | 6.9   | 7.2   | 8.0   | 7.32 ± 0.24   | 4.3-6.1<br>4.3-5.6         |
| Alkaline phosphatase      | 43    | 56    | 81    | 67    | 61.75 ± 8.08   | 50    | 41    | 82    | 116   | 72.25 ± 17.03 | 111-275<br>105-228         |
| SGPT (ALT)                | 24    | 20    | 18    | 22    | 21.00 ± 1.29   | 20    | 27    | 31    | 33    | 27.75 ± 2.88  | 28-129<br>27-195           |
| SGOT (AST)                | 55    | 33    | 48    | 29    | 41.25 ± 6.14   | 41    | 33    | 46    | 45    | 41.25 ± 2.95  | 46-392<br>43-397           |
| CPK                       | 130   | 154   | 221   | 23    | 132 ± 41       | 173   | 84    | 224   | 77    | 140 ± 36      | NA                         |
| Albumin                   | 2.6   | 2.7   | 2.7   | 2.8   | 2.70 ± 0.04    | 2.6   | 2.7   | 2.8   | 2.5   | 2.65 ± 0.06   | 2.8-3.8<br>2.4-4.3         |
| Total protein             | 4.5   | 4.5   | 4.5   | 4.5   | 4.5 ± 0.0      | 5.0   | 4.8   | 4.9   | 4.5   | 4.8 ± 0.1     | 4.8-7.0<br>4.8-7.2         |
| Globulin                  | 1.9   | 1.8   | 1.8   | 1.7   | 1.80 ± 0.04    | 2.4   | 2.1   | 2.1   | 2.0   | 2.15 ± 0.09   | NA                         |
| Total bilirubin           | 0.1   | 0.1   | 0.1   | 0.1   | 0.1 ± 0.0      | 0.1   | 0.1   | 0.1   | 0.1   | 0.1 ± 0.0     | 0.2-0.6<br>0.2-0.6         |
| BUN                       | 27    | 30    | 22    | 28    | 26.75 ± 1.70   | 26    | 28    | 28    | 24    | 26.5 ± 0.96   | 7-28<br>5-26               |
| Creatinine                | 0.1   | 0.1   | 0.1   | 0.1   | 0.1 ± 0.0      | 0.1   | 0.1   | 0.1   | 0.1   | 0.1 ± 0.0     | 0.2-0.5<br>0.2-0.5         |
| Cholesterol               | 99    | 78    | 80    | 96    | 88.25 ± 5.39   | 108   | 114   | 76    | 71    | 92.25 ± 10.94 | 69-169<br>55-164           |
| Glucose                   | 237   | 237   | 279   | 210   | 240.8 ± 14.3   | 218   | 215   | 191   | 156   | 195.0 ± 14.3  | 172-372<br>177-348         |
| Calcium                   | 9.1   | 8.9   | 9.1   | 9.0   | 9.03 ± 0.05    | 9.3   | 9.2   | 9.3   | 9.6   | 9.35 ± 0.09   | 9.7-12.5<br>9.7-12.3       |
| Phosphorus                | 5.6   | 5.5   | 7.2   | 6.6   | 6.23 ± 0.41    | 6.4   | 6.6   | 6.5   | 6.4   | 6.48 ± 0.05   | 5.9-14.5<br>5.3-13.5       |
| Bicarbonate               | 20    | 19    | 15    | 22    | 19.00 ± 1.47   | 23    | 23    | 19    | 21    | 21.50 ± 0.96  | NA                         |
| Chloride                  | 106   | 108   | 108   | 109   | 107.8 ± 0.6    | 106   | 107   | 110   | 112   | 108.8 ± 1.4   | 96.7-129.8<br>96.9-134.0   |
| Potassium                 | 4.3   | 3.9   | 3.9   | 3.2   | 3.83 ± 0.23    | 4.0   | 3.9   | 3.5   | 4.6   | 4.00 ± 0.23   | 5.3-11.2<br>5.3-10.8       |
| Sodium                    | 147   | 150   | 146   | 147   | 147.5 ± 0.9    | 152   | 150   | 147   | 149   | 149.5 ± 1.0   | 145.2-176.2<br>147.5-181.2 |

NA, reference ranges not available. SEM, standard error of the mean.

**Supplemental Table 3**Genes significantly up- and down-regulated in *Ciz1*<sup>-/-</sup> mice

| Affymetrix Cluster ID | Gene Symbol           | Gene Description                                              | Fold Change (FC≥1.25; p<0.05) |
|-----------------------|-----------------------|---------------------------------------------------------------|-------------------------------|
| 17478817              | <i>Gm22228</i>        | Predicted gene 22228                                          | 1.250                         |
| 17223509              | <i>Mpp4</i>           | Membrane protein, palmitoylated 4                             | 1.251                         |
| 17219758              | <i>Olfir248</i>       | Olfactory receptor 248                                        | 1.254                         |
| 17294402              | <i>Zfp72</i>          | Zinc finger protein 72                                        | 1.257                         |
| 17407240              | <i>Rps27</i>          | Ribosomal protein S27                                         | 1.257                         |
| 17254166              | <i>Slfn2</i>          | Schlafen2                                                     | 1.257                         |
| 17346069              | <i>Zfp119b</i>        | Zinc finger protein 119b                                      | 1.258                         |
| 17543639              | <i>Gm25828</i>        | Predicted gene 25828                                          | 1.259                         |
| 17494254              | <i>Olfir66</i>        | Olfactory receptor 66                                         | 1.260                         |
| 17459341              | <i>Igkv2-109</i>      | Immunoglobulin kappa variable 2-109                           | 1.262                         |
| 17291337              | <i>Gm11346</i>        | X-linked lymphocyte-regulated 5 pseudogene                    | 1.265                         |
| 17216721              | <i>Gm24547</i>        | Predicted gene 24547                                          | 1.266                         |
| 17344953              | <i>Crisp1</i>         | Cysteine-rich secretory protein 1                             | 1.267                         |
| 17548213              | <i>Wdr83os</i>        | WD repeat domain 83 opposite strand                           | 1.268                         |
| 17548454              | <i>Tomm5</i>          | Translocase of outer mitochondrial membrane 5 homolog (yeast) | 1.268                         |
| 17341392              | <i>Zfp947</i>         | Zinc finger protein 947                                       | 1.269                         |
| 17476698              | <i>Gm12766</i>        | Predicted gene 12766                                          | 1.270                         |
| 17236150              | <i>Ascl4</i>          | Achaete-Scute complex homolog 4 (Drosophila)                  | 1.271                         |
| 17477369              | <i>Klk1b3</i>         | kallikrein1-relatedpeptidaseb3                                | 1.272                         |
| 17508984              | <i>Gm23531</i>        | Predicted gene 23531                                          | 1.275                         |
| 17417821              | <i>Olfir1331</i>      | Olfactory receptor 1331                                       | 1.276                         |
| 17372810              | <i>Olfir1076</i>      | Olfactory receptor 1076                                       | 1.277                         |
| 17340548              | <i>Tmem181b-ps</i>    | Transmembrane protein 181B, pseudogene                        | 1.278                         |
| 17212872              | <i>Gm24053</i>        | Predicted gene 24053                                          | 1.278                         |
| 17351321              | <i>Mir122a</i>        | MicroRNA 122a                                                 | 1.280                         |
| 17547859              | <i>Wdr83os</i>        | WD repeat domain 83 opposite strand                           | 1.281                         |
| 17550304              | <i>Gm10999</i>        | Predicted gene 10999                                          | 1.285                         |
| 17458514              | <i>Npy</i>            | Neuropeptide Y                                                | 1.285                         |
| 17490274              | <i>Spib</i>           | Spi-B transcription factor (Spi-1/PU.1 related)               | 1.296                         |
| 17542727              | <i>LOC100503280</i>   | L antigen family member 3-like                                | 1.297                         |
| 17477331              | <i>Klk1b27</i>        | kallikrein1-related peptidase b27                             | 1.303                         |
| 17262241              | <i>9930111J21Rik2</i> | RIKEN cDNA 9930111J21gene 2                                   | 1.304                         |
| 17424928              | <i>Gm8069</i>         | Predicted pseudogene 8069                                     | 1.306                         |
| 17520156              | <i>Gm26611</i>        | Predicted gene 26611                                          | 1.306                         |
| 17462738              | <i>Clec4a3</i>        | C-type lectin domain family 4, member A3                      | 1.306                         |
| 17477002              | <i>Vmn2r60</i>        | Vomer nasal 2, receptor 60                                    | 1.310                         |
| 17412717              | <i>Gm22732</i>        | Predicted gene 22732                                          | 1.315                         |
| 17353356              | <i>Gm22814</i>        | Predicted gene 22814                                          | 1.316                         |
| 17467466              | <i>Igkv4-55</i>       | Immunoglobulin kappa variable 4-55                            | 1.317                         |

|          |                    |                                                                                   |       |
|----------|--------------------|-----------------------------------------------------------------------------------|-------|
| 17400220 | <i>Gm22301</i>     | Predicted gene 22301                                                              | 1.317 |
| 17543102 | <i>Gm24812</i>     | Predicted gene 24812                                                              | 1.318 |
| 17494418 | <i>Trim30e-ps1</i> | Tripartite motif-containing 30E, pseudogene 1                                     | 1.318 |
| 17285834 | <i>Hist1h2bg</i>   | Histone cluster 1, H2bg                                                           | 1.322 |
| 17385363 | <i>Gm23315</i>     | Predicted gene 23315                                                              | 1.322 |
| 17301615 | <i>Entpd4</i>      | Ectonucleoside triphosphate diphosphohydrolase 4                                  | 1.339 |
| 17301647 | <i>Entpd4</i>      | Ectonucleoside triphosphate diphosphohydrolase 4                                  | 1.348 |
| 17349902 | <i>Pcdhb11</i>     | Proto cadherin beta 11                                                            | 1.356 |
| 17284498 | <i>Ighv10-1</i>    | Immunoglobulin heavy variable 10-1                                                | 1.365 |
| 17487533 | <i>Vmn1r103</i>    | Vomer nasal 1 receptor 103                                                        | 1.372 |
| 17299135 | <i>Gm21991</i>     | Predicted gene 21991                                                              | 1.384 |
| 17346001 | <i>Mrps36-ps1</i>  | Mitochondrial ribosomal protein S36, pseudogene 1                                 | 1.388 |
| 17330649 | <i>Gm17783</i>     | Predicted gene 17783                                                              | 1.398 |
| 17387758 | <i>Olf1128</i>     | olfactoryreceptor1128                                                             | 1.402 |
| 17231617 | <i>Gm23601</i>     | Predicted gene 23601                                                              | 1.403 |
| 17352345 | <i>Gm25418</i>     | Predicted gene 25418                                                              | 1.405 |
| 17526707 | <i>Zbtb16</i>      | Zinc finger and BTB domain containing 16                                          | 1.409 |
| 17547846 | <i>Gm21464</i>     | Predicted gene 21464                                                              | 1.414 |
| 17424217 | <i>Gm26084</i>     | Predicted gene 26084                                                              | 1.417 |
| 17536233 | <i>Gm5941</i>      | Predicted gene5941                                                                | 1.417 |
| 17547837 | <i>Gm21464</i>     | Predicted gene 21464                                                              | 1.420 |
| 17550582 | <i>mt-Tp</i>       | Mitochondrially encoded tRNA proline                                              | 1.422 |
| 17337570 | <i>Olf1108</i>     | Olfactory receptor 108                                                            | 1.434 |
| 17397555 | <i>Gm24851</i>     | Predicted gene 24851                                                              | 1.436 |
| 17537906 | <i>Kir3dl1</i>     | Killer cell immunoglobulin-like receptor, three domains, long cytoplasmic tail, 1 | 1.449 |
| 17337595 | <i>Olf1122</i>     | Olfactory receptor 122                                                            | 1.463 |
| 17258642 | <i>Snord1b</i>     | Small nucleolar RNA,C/Dbox1B                                                      | 1.466 |
| 17355133 | <i>Gm24679</i>     | Predicted gene 24679                                                              | 1.475 |
| 17266967 | <i>Ccl3</i>        | Chemokine (C-Cmotif) ligand 3                                                     | 1.476 |
| 17532653 | <i>mt-Tp</i>       | Mitochondrially encoded tRNA proline                                              | 1.478 |
| 17495368 | <i>Nup35</i>       | nucleoporin35                                                                     | 1.481 |
| 17291019 | <i>Hist1h4m</i>    | histonecluster1,H4m                                                               | 1.486 |
| 17532643 | <i>mt-Tc</i>       | Mitochondrially encoded tRNA cysteine                                             | 1.494 |
| 17550558 | <i>mt-Tc</i>       | Mitochondrially encoded tRNA cysteine                                             | 1.494 |
| 17510624 | <i>Gm22544</i>     | Predicted gene 22544                                                              | 1.495 |
| 17532645 | <i>mt-Ty</i>       | Mitochondrially encoded tRNA tyrosine                                             | 1.495 |
| 17285780 | <i>Gm11314</i>     | predictedgene11314                                                                | 1.542 |
| 17467537 | <i>LOC637260</i>   | IgkappachainV-IVregionB17precursor-like                                           | 1.560 |
| 17550560 | <i>mt-Ty</i>       | Mitochondrially encoded tRNA tyrosine                                             | 1.563 |
| 17547840 | <i>Gm10325</i>     | Predicted gene 10325                                                              | 1.576 |
| 17549910 | <i>Tomm5</i>       | Translocase of outer mitochondrial membrane 5 homolog (yeast)                     | 1.593 |
| 17532641 | <i>mt-Tn</i>       | Mitochondrially encoded tRNA asparagine                                           | 1.596 |

|          |                      |                                                                                         |        |
|----------|----------------------|-----------------------------------------------------------------------------------------|--------|
| 17532635 | <i>mt-Tt</i>         | Mitochondrially encoded tRNA threonine                                                  | 1.612  |
| 17526657 | <i>Gm22805</i>       | Predicted gene 22805                                                                    | 1.623  |
| 17547835 | <i>Gm20236</i>       | Predicted gene 20236                                                                    | 1.637  |
| 17547844 | <i>Gm20236</i>       | Predicted gene 20236                                                                    | 1.637  |
| 17550580 | <i>mt-Tt</i>         | Mitochondrially encoded tRNA threonine                                                  | 1.730  |
| 17383886 | <i>1110008P14Rik</i> | RIKEN cDNA 1110008P14 gene                                                              | 1.762  |
| 17290666 | <i>Prl2c3</i>        | Prolactinfamily2, subfamily c, member 3                                                 | 1.941  |
| 17290674 | <i>Prl2c2</i>        | Prolactinfamily2, subfamily c, member 2                                                 | 1.972  |
| 17547842 | <i>Gm10002</i>       | Predicted gene 10002                                                                    | 2.536  |
| 17547849 | <i>Gm10002</i>       | Predicted gene 10002                                                                    | 2.536  |
| 17395969 | <i>Gm23237</i>       | Predicted gene 23237                                                                    | 2.652  |
| 17550158 | <i>Gm23237</i>       | Predicted gene 23237                                                                    | 2.652  |
| 17308165 | <i>Gm21464</i>       | Predicted gene 21464                                                                    | 3.143  |
| 17369789 | <i>Ciz1</i>          | CDKN1A interacting zinc finger protein 1                                                | -3.111 |
| 17546762 | <i>Mid1</i>          | Midline1                                                                                | -2.023 |
| 17478459 | <i>Slc17a6</i>       | Solute carrier family 17(sodium-dependent inorganic phosphate co-transporter), member 6 | -1.938 |
| 17546215 | <i>Gm15726</i>       | Predicted gene 15726                                                                    | -1.903 |
| 17237336 | <i>Kcnc2</i>         | Potassium voltage gated channel, Shaw-related subfamily, member 2                       | -1.604 |
| 17443801 | <i>Gm22956</i>       | Predicted gene 22956                                                                    | -1.600 |
| 17385374 | <i>Nr4a2</i>         | Nuclear receptor subfamily 4, group A, member 2                                         | -1.597 |
| 17381774 | <i>C1q3</i>          | C1q-like3                                                                               | -1.531 |
| 17233022 | <i>Cd24a</i>         | CD24a antigen                                                                           | -1.518 |
| 17486261 | <i>Vmn2r41</i>       | Vomer nasal 2, receptor 41                                                              | -1.463 |
| 17304512 | <i>Gm24916</i>       | Predicted gene 24916                                                                    | -1.403 |
| 17492858 | <i>Gm10160</i>       | Predicted gene 10160                                                                    | -1.392 |
| 17389608 | <i>Meis2</i>         | Meis homeobox 2                                                                         | -1.378 |
| 17298654 | <i>Gm25498</i>       | Predicted gene 25498                                                                    | -1.369 |
| 17529640 | <i>Ankrd34c</i>      | Ankyrin repeat domain 34C                                                               | -1.369 |
| 17364588 | <i>Opalin</i>        | Oligodendrocytic myelin paranodal and inner loop protein                                | -1.367 |
| 17315178 | <i>Nr4a1</i>         | Nuclear receptor subfamily 4, group A, member 1                                         | -1.358 |
| 17299869 | <i>Trav9d-4</i>      | T-cell receptor alpha variable 9D-4                                                     | -1.350 |
| 17536420 | <i>Gpr165</i>        | G-protein-coupled receptor 165                                                          | -1.346 |
| 17525088 | <i>Gm25346</i>       | Predicted gene 25346                                                                    | -1.341 |
| 17395985 | <i>Zfx4</i>          | Zinc finger homeodomain 4                                                               | -1.340 |
| 17282098 | <i>Gm22696</i>       | Predicted gene 22696                                                                    | -1.327 |
| 17467418 | <i>Igkv4-79</i>      | Immunoglobulin kappa variable 4-79                                                      | -1.324 |
| 17236892 | <i>Gad1-ps</i>       | Glutamate decarboxylase 1, pseudogene                                                   | -1.321 |
| 17542062 | <i>Mir743</i>        | Micro RNA 743                                                                           | -1.319 |
| 17472288 | <i>Lmo3</i>          | LIM domain only 3                                                                       | -1.311 |
| 17471648 | <i>Klra5</i>         | Killer cell lectin-like receptor, subfamily A, member 5                                 | -1.302 |
| 17502084 | <i>Mir1969</i>       | Micro RNA 1969                                                                          | -1.300 |
| 17548294 | <i>Gm10931</i>       | Predicted gene 10931                                                                    | -1.293 |

|          |                      |                                                                   |        |
|----------|----------------------|-------------------------------------------------------------------|--------|
| 17548498 | <i>Gm10931</i>       | Predicted gene 10931                                              | -1.293 |
| 17441524 | <i>Hrk</i>           | Harakiri, BCL2 interacting protein (contains only BH3 domain)     | -1.289 |
| 17484266 | <i>C030029H02Rik</i> | RIKEN Cdna C030029H02 gene                                        | -1.288 |
| 17516410 | <i>Mirlet7a-2</i>    | Micro RNA let7a-2                                                 | -1.286 |
| 17550428 | <i>Neat1</i>         | Nuclear paraspeckle assembly transcript1 (non-proteinencoding)    | -1.283 |
| 17358598 | <i>Il33</i>          | Interleukin 33                                                    | -1.281 |
| 17391332 | <i>Mal</i>           | Myelin and lymphocyte protein, T-cell differentiation protein     | -1.281 |
| 17344822 | <i>Mog</i>           | Myelin oligodendrocyte glycoprotein                               | -1.278 |
| 17235352 | <i>Gm22721</i>       | Predicted gene 22721                                              | -1.278 |
| 17418581 | <i>Col8a2</i>        | Collagen, type VIII, alpha 2                                      | -1.278 |
| 17288946 | <i>Mir9-2</i>        | Micro RNA 9-2                                                     | -1.278 |
| 17524969 | <i>Anln</i>          | Anillin, actin binding protein                                    | -1.273 |
| 17413945 | <i>Nr4a3</i>         | Nuclear receptor subfamily 4, group A, member 3                   | -1.272 |
| 17330152 | <i>Gm25024</i>       | Predicted gene 25024                                              | -1.272 |
| 17550464 | <i>Sox2ot</i>        | SOX2 overlapping transcript (non-proteinencoding)                 | -1.271 |
| 17240109 | <i>Nkain2</i>        | Na <sup>+</sup> /K <sup>+</sup> transporting ATPase interacting 2 | -1.268 |
| 17363204 | <i>Psat1</i>         | Phosphoserine aminotransferase 1                                  | -1.268 |
| 17385398 | <i>Ernm</i>          | Ermin, ERM-like protein                                           | -1.258 |
| 17487211 | <i>Fosb</i>          | FBJ osteosarcoma oncogene B                                       | -1.255 |
| 17309366 | <i>Gm23242</i>       | Predicted gene 23242                                              | -1.254 |
| 17299842 | <i>Trav9n-4</i>      | T-cell receptor alpha variable 9N-4                               | -1.254 |
| 17483190 | <i>Kctd13</i>        | Potassium channel tetramerisation domain containing 13            | -1.254 |
| 17266627 | <i>Gm24454</i>       | Predicted gene 24454                                              | -1.251 |
| 17342642 | <i>Dusp1</i>         | Dual specificity phosphatase 1                                    | -1.251 |

**Supplemental Table 4**

Enriched Kyoto Encyclopedia of Genes and Genomes (KEGG) pathways. <sup>a</sup>Enrichment relative to number of reference genes in the genome based on the hypergeometric test. <sup>b</sup>Hypergeometric test based.

<sup>c</sup>Benjamini & Hochberg multiple test correction.

| <b>Pathway</b>                                       | <b>No. of Genes</b> | <b>Enrichment<sup>a</sup></b> | <b>raw P-value<sup>b</sup></b> | <b>adj P-value<sup>c</sup></b> |
|------------------------------------------------------|---------------------|-------------------------------|--------------------------------|--------------------------------|
| <b><i>Up-regulated</i></b>                           |                     |                               |                                |                                |
| Metabolic pathways                                   | 23                  | 2.5                           | 6.73E-05                       | 3.70E-03                       |
| Cytokine-cytokine receptor interaction               | 9                   | 4.73                          | 1.00E-04                       | 3.70E-03                       |
| Rheumatoid arthritis                                 | 5                   | 7.95                          | 4.00E-04                       | 9.70E-03                       |
| Olfactory transduction                               | 18                  | 2.30                          | 1.10E-03                       | 2.01E-02                       |
| Cysteine and methionine metabolism                   | 3                   | 9.91                          | 3.40E-03                       | 4.96E-02                       |
| Systemic lupus erythematosus                         | 5                   | 4.32                          | 6.30E-03                       | 5.04E-02                       |
| N-Glycan biosynthesis                                | 3                   | 7.73                          | 6.90E-03                       | 5.04E-02                       |
| Small cell lung cancer                               | 4                   | 5.92                          | 4.80E-03                       | 5.04E-02                       |
| Parkinson's disease                                  | 5                   | 4.35                          | 6.10E-03                       | 5.04E-02                       |
| Dilated cardiomyopathy                               | 4                   | 5.79                          | 5.20E-03                       | 5.04E-02                       |
| <b><i>Down-regulated</i></b>                         |                     |                               |                                |                                |
| Metabolic pathways                                   | 30                  | 2.81                          | 5.64E-07                       | 5.36E-05                       |
| Focal adhesion                                       | 10                  | 5.54                          | 1.60E-05                       | 8.00E-04                       |
| Glycosaminoglycan biosynthesis - chondroitin sulfate | 4                   | 20.15                         | 4.21E-05                       | 1.20E-03                       |
| Neuroactive ligand-receptor interaction              | 11                  | 4.40                          | 5.10E-05                       | 1.20E-03                       |
| TGF-beta signaling pathway                           | 6                   | 7.82                          | 1.00E-04                       | 1.60E-03                       |
| ECM-receptor interaction                             | 6                   | 7.73                          | 1.00E-04                       | 1.60E-03                       |
| MAPK signaling pathway                               | 10                  | 4.14                          | 2.00E-04                       | 2.70E-03                       |
| Toll-like receptor signaling pathway                 | 6                   | 6.58                          | 3.00E-04                       | 3.60E-03                       |
| B cell receptor signaling pathway                    | 5                   | 7.29                          | 6.00E-04                       | 6.30E-03                       |
| Osteoclast differentiation                           | 6                   | 5.64                          | 7.00E-04                       | 6.60E-03                       |

## Supplemental Table 5

Ingenuity Pathway Analysis (IPA) top up- and down-regulated biological functions and canonical pathways. <sup>a</sup>Fischer's exact test was used to calculate a p-value determining the probability that each biological function assigned to that data set is due to chance alone. <sup>b</sup>Fischer's exact test was used to calculate a p-value determining the probability that each canonical pathway assigned to that data set is due to chance alone. <sup>c</sup>Number of genes in a pathway that were found in our significant gene list compared to the total number of genes in that pathway. <sup>d</sup>Network score is the negative log of the p-value for the likelihood that network molecules would be found together by chance alone. A higher score indicates a greater statistical significance that molecules depicted in the network are interconnected.

| Top Up-Regulated Biological Functions                |                                                                                                        | P value <sup>a</sup>       | No. of Molecules           |
|------------------------------------------------------|--------------------------------------------------------------------------------------------------------|----------------------------|----------------------------|
| <b>Molecular and Cellular Functions</b>              |                                                                                                        |                            |                            |
|                                                      | Cellular Movement                                                                                      | 4.74E-02 – 1.18E-05        | 4                          |
|                                                      | Cell Development                                                                                       | 4.74E-02 – 2.36E-05        | 16                         |
|                                                      | Cellular Growth and Proliferation                                                                      | 4.74E-02 – 2.36E-05        | 17                         |
|                                                      | Cell Morphology                                                                                        | 4.74E-02 – 1.38E-04        | 13                         |
|                                                      | Cell-To-Cell Signaling and Interaction                                                                 | 3.29E-02 – 3.34E-04        | 19                         |
| <b>Physiological System Development and Function</b> |                                                                                                        |                            |                            |
|                                                      | Hair and Skin Development and Function                                                                 | 1.18E-05 – 1.18E-05        | 2                          |
|                                                      | Tissue Morphology                                                                                      | 4.74E-02 – 1.18E-05        | 15                         |
|                                                      | Embryonic Development                                                                                  | 4.30E-02 – 3.53E-05        | 7                          |
|                                                      | Lymphoid Tissue Structure and Development                                                              | 4.74E-02 – 3.53E-05        | 9                          |
|                                                      | Organ Development                                                                                      | 4.74E-02 – 3.53E-05        | 8                          |
| <b>Top Up-Regulated Canonical Pathways</b>           |                                                                                                        | <b>P value<sup>b</sup></b> | <b>Overlap<sup>c</sup></b> |
|                                                      | Primary Immunodeficiency Signaling                                                                     | 6.16E-03                   | 5.9%                       |
|                                                      | Crosstalk between Dendritic Cells and Natural Killer Cells                                             | 2.32E-02                   | 2.9%                       |
|                                                      | Atherosclerosis Signaling                                                                              | 5.57E-02                   | 1.8%                       |
|                                                      | B Cell Development                                                                                     | 7.35E-02                   | 4.5%                       |
|                                                      | Intrinsic Prothrombin Activation Pathway                                                               | 8.94E-02                   | 3.7%                       |
| <b>ID</b>                                            | <b>Associated Network Functions</b>                                                                    |                            | <b>Score<sup>d</sup></b>   |
| 1                                                    | Cellular Development, Cellular Growth and Proliferation, Hematological System Development and Function |                            | 29                         |
| 2                                                    | Protein Synthesis, Endocrine System Development and Function, Molecular Transport                      |                            | 19                         |
| 3                                                    | Inflammatory Response, Cellular Movement, Hematological System Development and Function                |                            | 13                         |
| 4                                                    | DNA Replication, Recombination, and Repair, Nucleic Acid Metabolism, Small Molecule Biochemistry       |                            | 2                          |
| 5                                                    | Embryonic Development, Organ Development, Organismal Development                                       |                            | 2                          |
| <b>Top Down-Regulated Biological Functions</b>       |                                                                                                        | <b>P value<sup>a</sup></b> | <b>No. of Molecules</b>    |
| <b>Molecular and Cellular Functions</b>              |                                                                                                        |                            |                            |
|                                                      | Cell Cycle                                                                                             | 8.29E-03 – 6.87E-08        | 4                          |
|                                                      | Cellular Development                                                                                   | 2.87E-02 – 6.87E-08        | 33                         |
|                                                      | Cell Death and Survival                                                                                | 2.58E-02 – 1.18E-06        | 22                         |
|                                                      | Gene Expression                                                                                        | 2.54E-02 – 1.79E-05        | 12                         |
|                                                      | Cell Morphology                                                                                        | 2.47E-02 – 1.02E-04        | 23                         |
| <b>Physiological System Development and Function</b> |                                                                                                        |                            |                            |
|                                                      | Embryonic Development                                                                                  | 2.87E-02 – 3.79E-06        | 23                         |
|                                                      | Nervous System Development and Function                                                                | 2.87E-02 – 3.79E-06        | 22                         |
|                                                      | Organ Morphology                                                                                       | 2.87E-02 – 3.79E-06        | 18                         |
|                                                      | Organismal Development                                                                                 | 2.87E-02 – 3.79E-06        | 28                         |
|                                                      | Connective Tissue Development and Function                                                             | 2.87E-02 – 4.42E-05        | 11                         |
| <b>Top Down-Regulated Canonical Pathways</b>         |                                                                                                        | <b>P value<sup>b</sup></b> | <b>Overlap<sup>c</sup></b> |
|                                                      | Sulfate Activation for Sulfonation                                                                     | 8.29E-03                   | 50.0%                      |
|                                                      | Neuroprotective Role of THOP1 in Alzheimer's Disease                                                   | 9.27E-03                   | 5.7%                       |
|                                                      | Serine Biosynthesis                                                                                    | 1.65E-02                   | 25.0%                      |
|                                                      | Superpathway of Serine and Glycine Biosynthesis I                                                      | 2.47E-02                   | 16.7%                      |
|                                                      | Acute Phase Response Signaling                                                                         | 2.76E-02                   | 1.9%                       |
| <b>ID</b>                                            | <b>Associated Network Functions</b>                                                                    |                            | <b>Score<sup>d</sup></b>   |
| 1                                                    | Cellular Development, Cellular Growth and Proliferation, Nervous System Development and Function       |                            | 26                         |
| 2                                                    | Cellular Development, Cellular Growth and Proliferation, Digestive System Development and Function     |                            | 24                         |
| 3                                                    | Cell Cycle, Cellular Development, Cell Death and Survival                                              |                            | 17                         |
| 4                                                    | Cellular Development, Cellular Growth and Proliferation, Hematological System Development and Function |                            | 8                          |
| 5                                                    | Hematological System Development and Function, Hematopoiesis, Tissue Development                       |                            | 2                          |



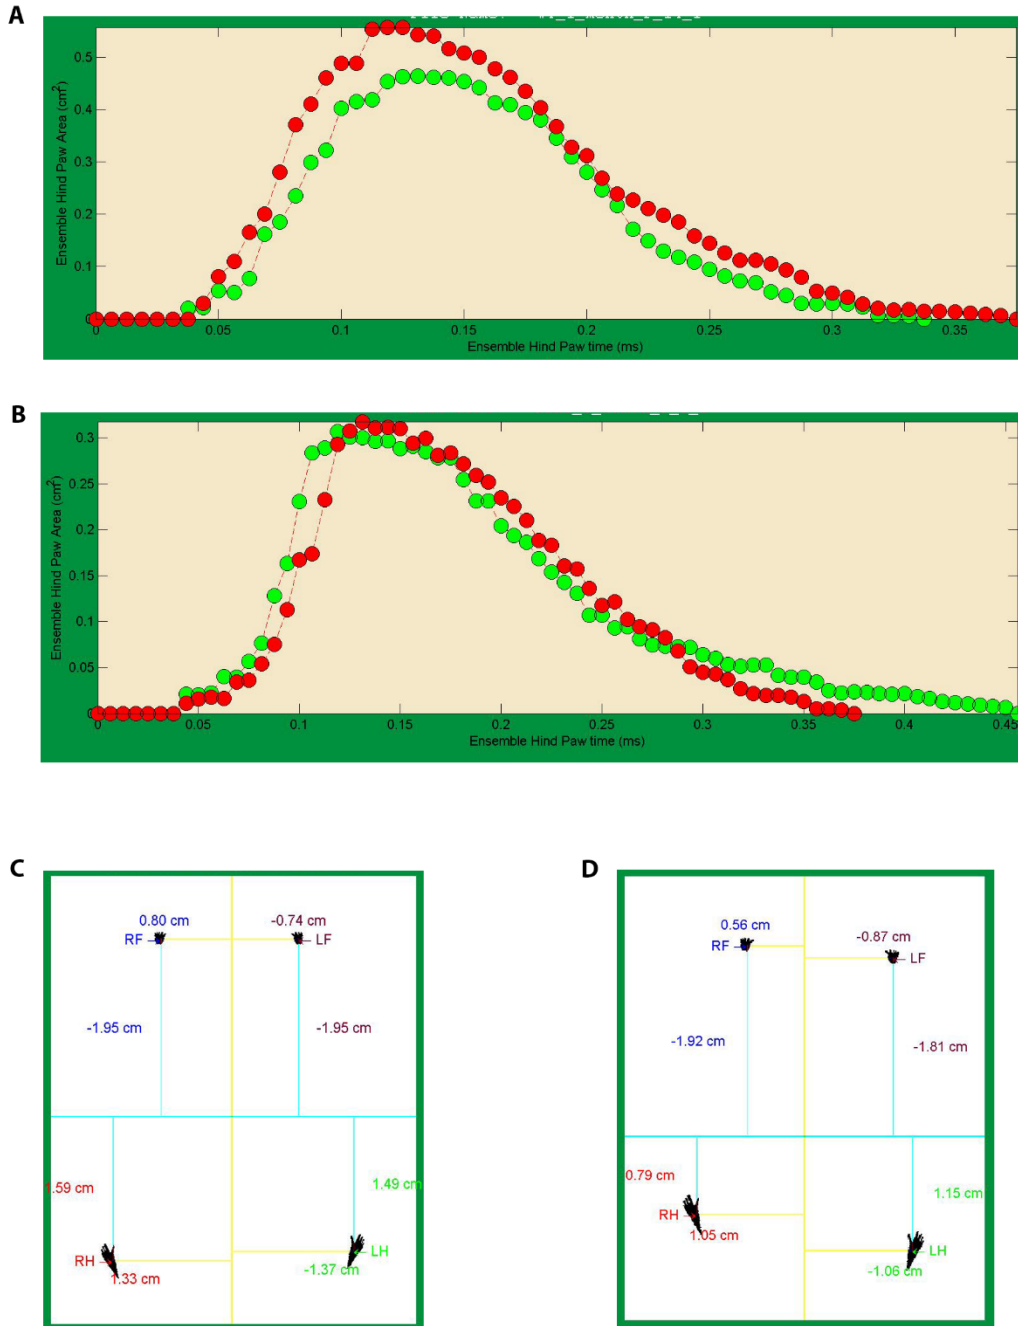

**Supplemental Fig. 1.** DigiGait™ data from WT (A and C) and *Ciz1*<sup>-/-</sup> (B and D) mice. Left (green) and right (red). Panels C and D show automated measurements of gait parameters including paw areas, stance width and stride length. LF/RF, left/right forepaws. LH/RH, left/right hindpaws.

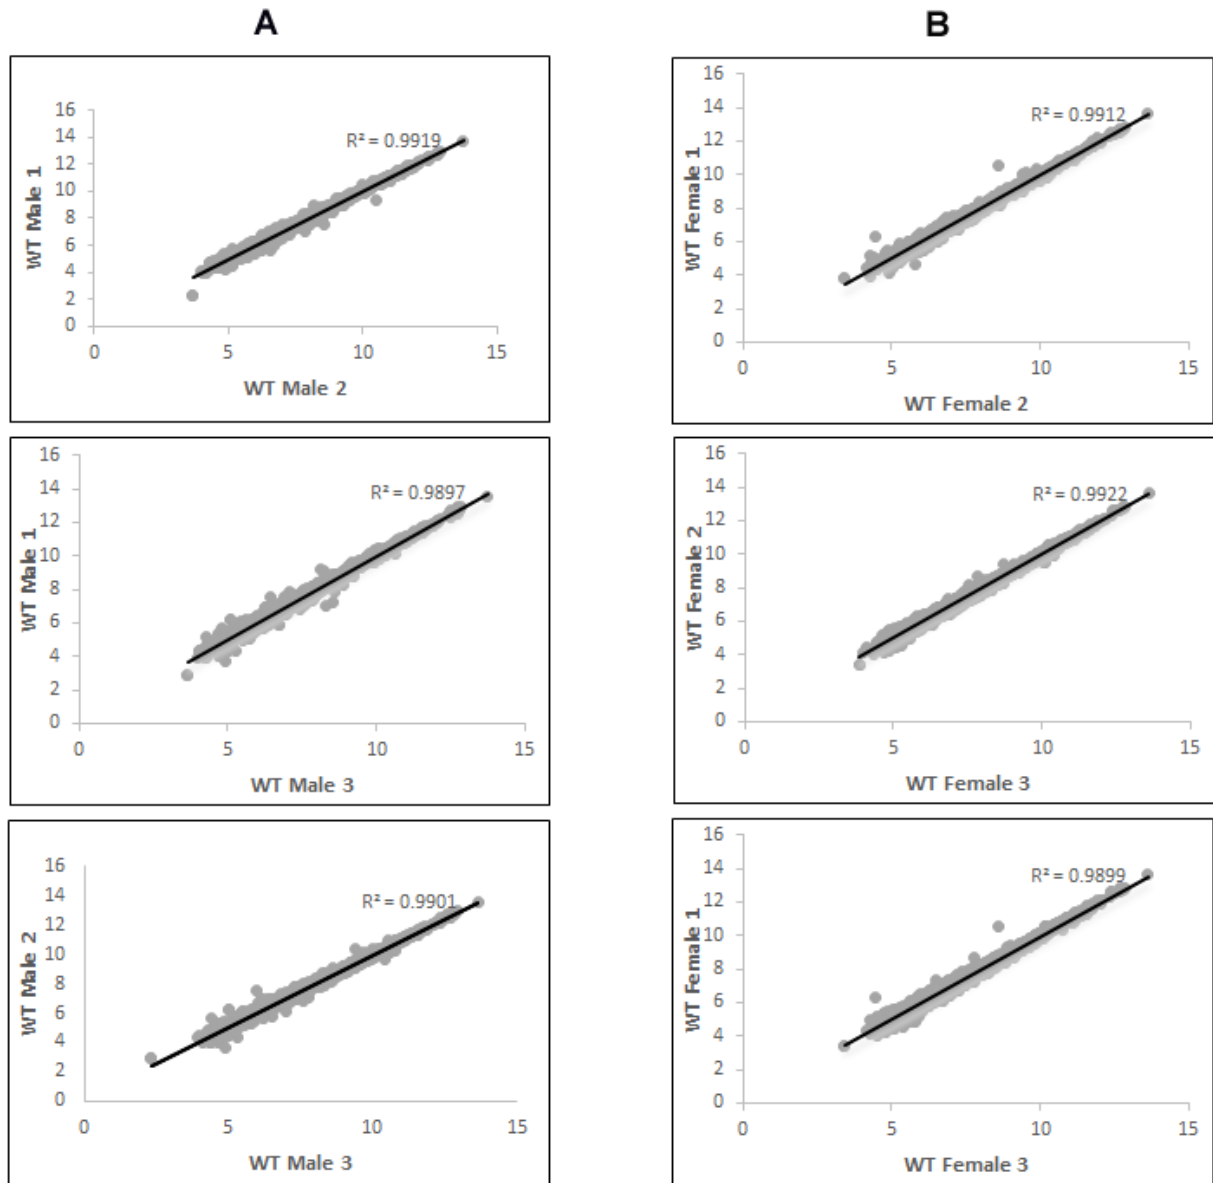

**Supplemental Fig. 2.** Scatter plots of filtered and normalized expression values for three male (A) and three female (B) WT mouse arrays.

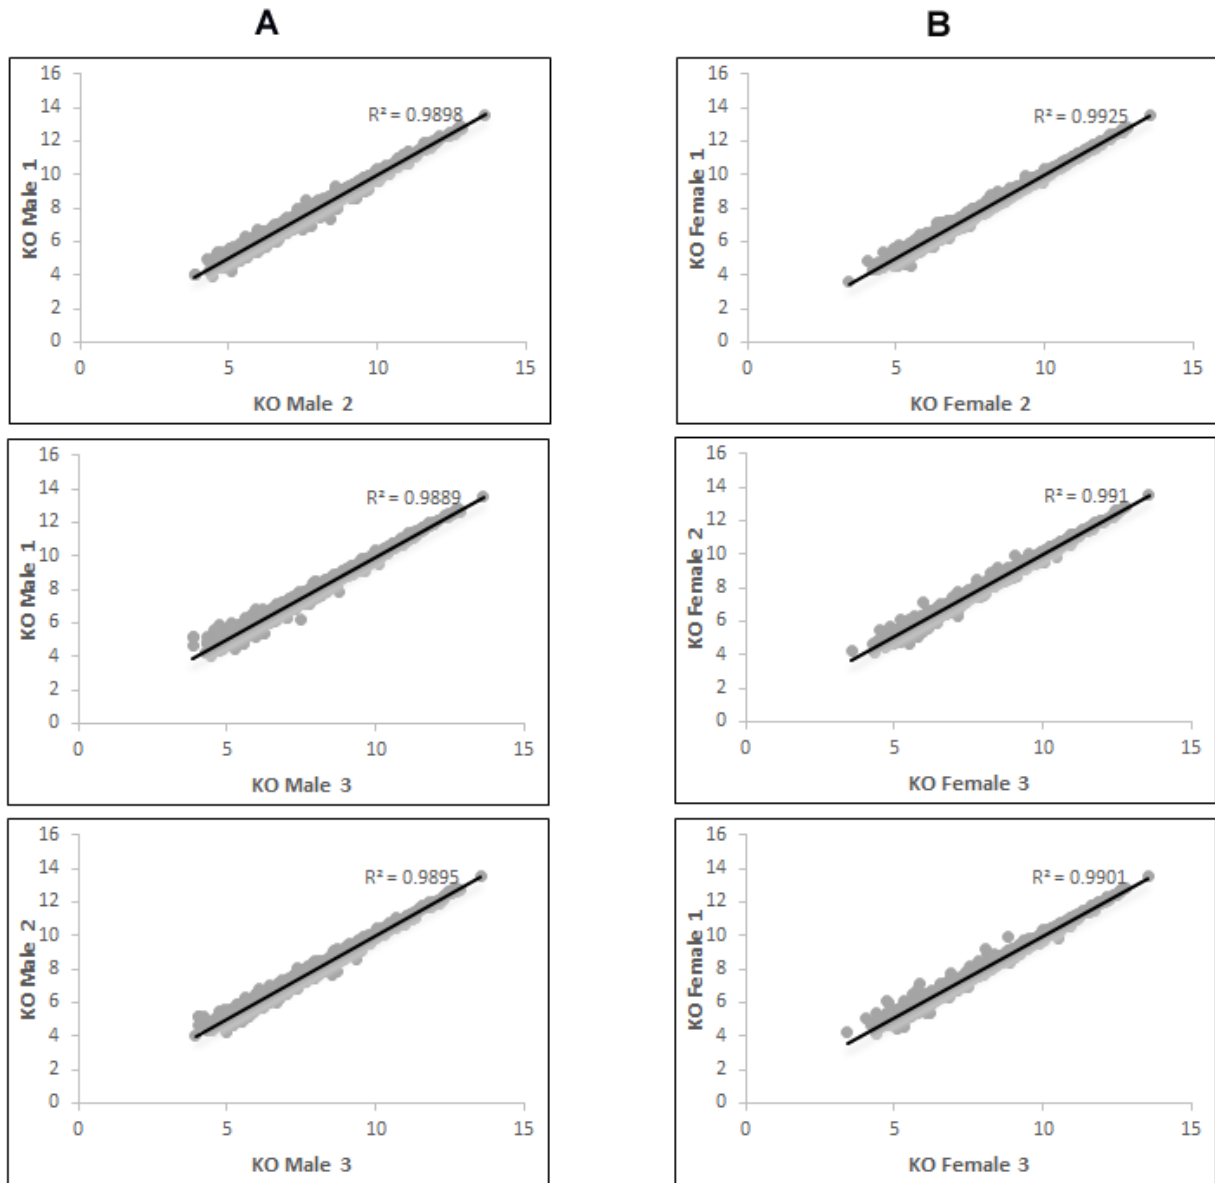

**Supplemental Fig. 3.** Scatter plots of filtered and normalized expression values for three male (A) and three female (B) *Ciz1*<sup>-/-</sup> mouse arrays.

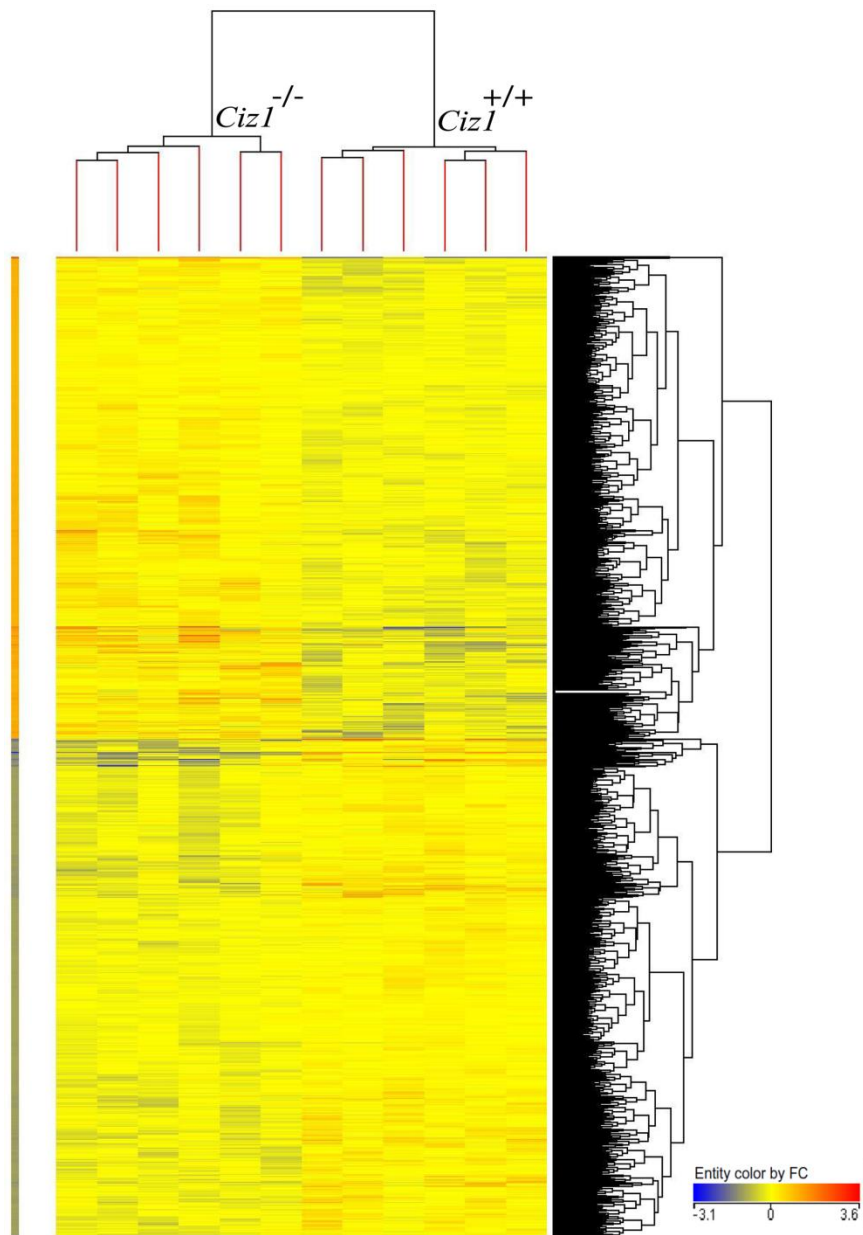

**Supplemental Fig. 4.** Heat map for whole-genome gene expression analysis of *Ciz1*<sup>-/-</sup> mouse cerebellum (*Ciz1*<sup>-/-</sup>, 3 male and 3 female mice; *Ciz1*<sup>+/+</sup>, 3 male and 3 female littermates).

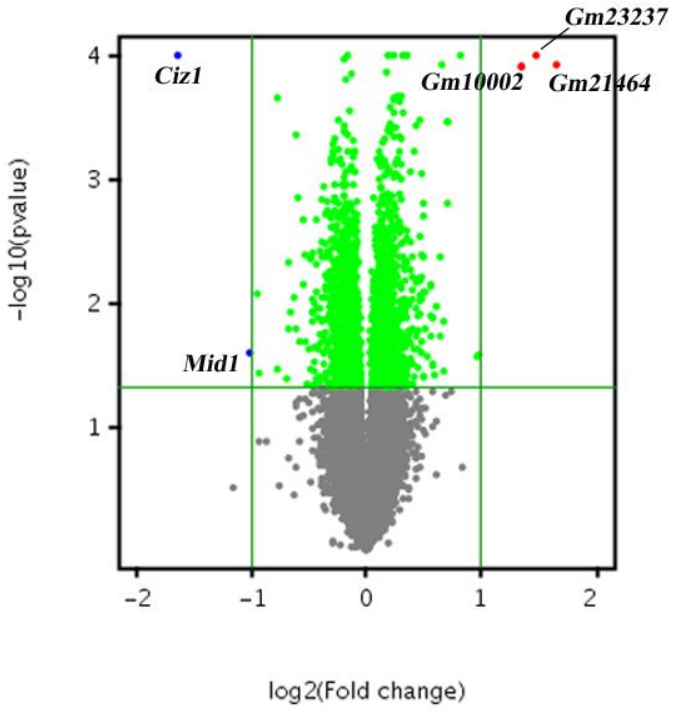

**Supplemental Fig. 5.** A volcano plot for whole-genome gene expression analysis of *Ciz1*<sup>-/-</sup> mouse cerebellum (*Ciz1*<sup>-/-</sup>, 3 male and 3 female mice; *Ciz1*<sup>+/+</sup>, 3 male and 3 female littermates). The plot displays mean fold differences for each probe set in *Ciz1*<sup>+/+</sup> and *Ciz1*<sup>-/-</sup> samples as a function of *p* value. Genes showing differential expression with *p* values < 0.05 are depicted with green dots. Other genes are represented with gray dots. Red dots represent genes with > 2X up-regulation (*p* < 0.05) and blue dots represent genes with > 2X down-regulation (*p* < 0.05).

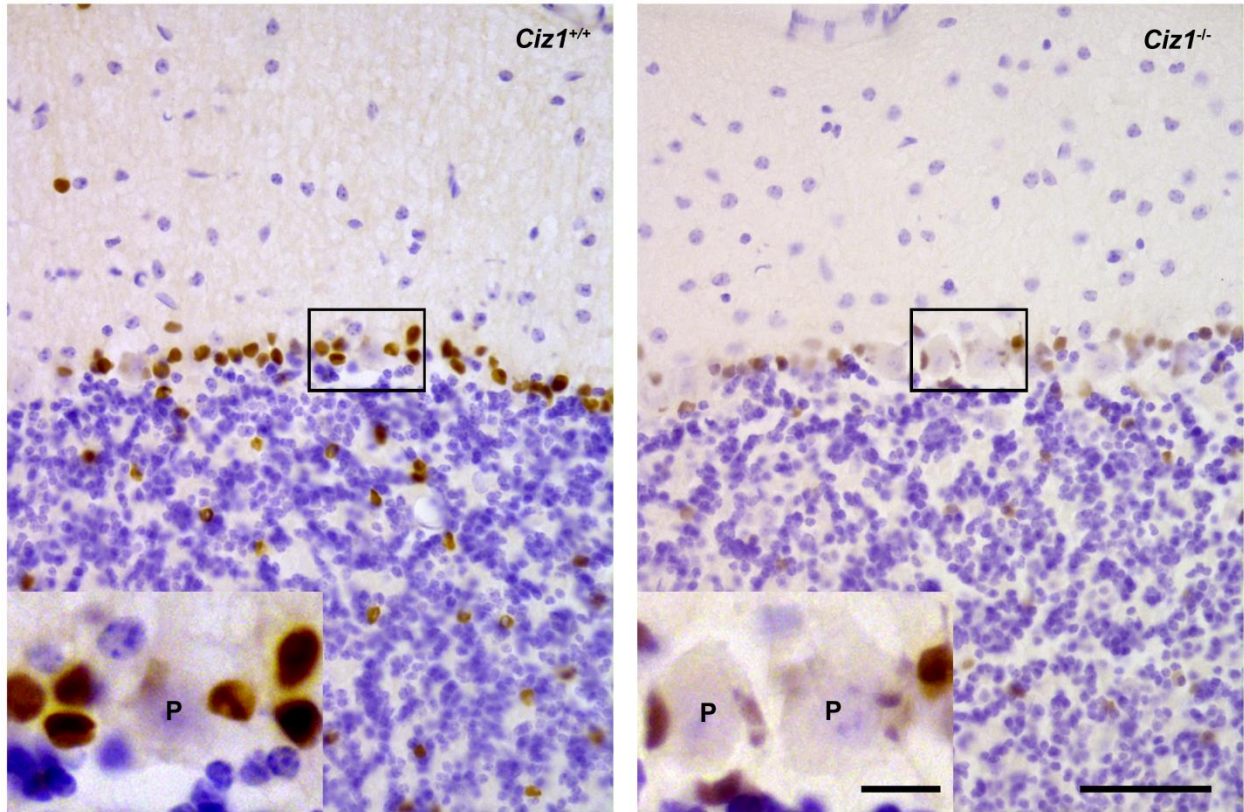

**Supplemental Fig. 6.** Immunohistochemistry of CIZ1 expression in cerebellum of *Ciz1*<sup>+/+</sup> (WT) and *Ciz1*<sup>-/-</sup> mice. P, Purkinje cell. Scale bar = 50  $\mu$ m.

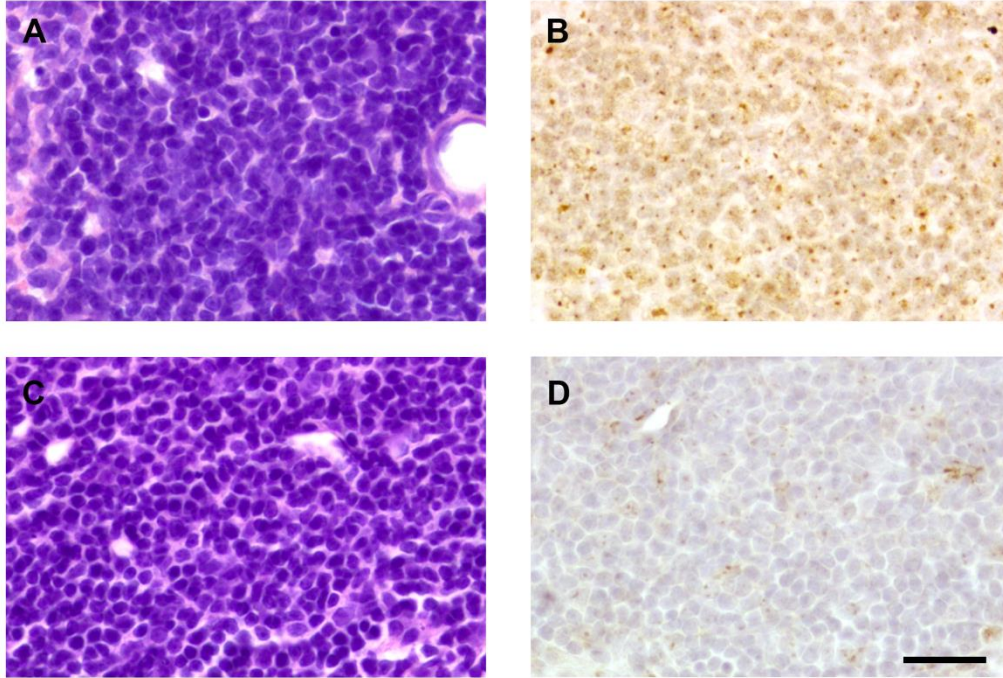

**Supplemental Fig. 7.** Contiguous paraffin sections from *Ciz1*<sup>+/+</sup> (A, B) and *Ciz1*<sup>-/-</sup> (C, D) spleen stained with hematoxylin and eosin (A, C) or processed for immunohistochemical detection of CIZ1.
